# Supplementary material
Source: PubMed Central journal article supplement (PMC8547803)
Supplement: mmc1.pdf [file mmc1.pdf]

# THE LANCET

## Rheumatology

### Supplementary appendix

This appendix formed part of the original submission. We post it as supplied by the authors.

Supplement to: Schmiedeberg K, Vuilleumier N, Pagano S, et al. Efficacy and tolerability of a third dose of an mRNA anti-SARS-CoV-2 vaccine in patients with rheumatoid arthritis with absent or minimal serological response to two previous doses. *Lancet Rheumatol* 2021; published online Oct 26. [https://doi.org/10.1016/S2665-9913\(21\)00328-3](https://doi.org/10.1016/S2665-9913(21)00328-3).

Table 1. Baseline characteristics of RA patients eligible for a third anti-SARS-CoV-2 mRNA based vaccine dose

|                                                                     | RA Patients receiving three vaccine doses (n=17) |
|---------------------------------------------------------------------|--------------------------------------------------|
| Age (yrs), mean ( $\pm$ SD)                                         | 67.3 (12.2)                                      |
| Female gender, n (%)                                                | 8 (47)                                           |
| Male gender, n (%)                                                  | 9 (53)                                           |
| <b>Vaccination type/schedule</b>                                    |                                                  |
| mRNA-1273, n (%)                                                    | 3 (17.6)                                         |
| BNT162b2, n (%)                                                     | 14 (82.4)                                        |
| Mean interval between 2nd and 3rd vaccination (days $\pm$ SD)       | 139 $\pm$ 21                                     |
| Median interval between 2nd and 3 <sup>rd</sup> vaccination (days)  | 139 (IQR 123-156)                                |
| Mean interval between 3rd vaccine dose and sampling (days $\pm$ SD) | 15 $\pm$ 2.4                                     |
| Median interval between 3rd vaccine dose and sampling (days)        | 14 (IQR 14-17.5)                                 |
| <b>RA disease characteristics</b>                                   |                                                  |
| ACPA $\pm$ RF positivity, n (%)                                     | 12/17 (71)                                       |
| RA disease duration (yrs $\pm$ SD)                                  | 13 $\pm$ 10                                      |
| <b>DMARD therapy</b>                                                |                                                  |
| Monotherapy of csDMARDs, n (%)                                      | 1/17 (5.9)                                       |
| bDMARDs, n (%)                                                      | 8/17 (47.1)                                      |
| Monotherapy of bDMARDs, n (%)                                       | 3/8 (37.5)                                       |
| JAK inhibitors, n (%)                                               | 8/17 (47.1)                                      |
| Monotherapy of JAK inhibitors, n (%)                                | 3/8 (37.5)                                       |
| Prednisone, n (%)                                                   | 6/17 (35.3)                                      |
| Mean daily dose prednisone (mg $\pm$ SD)                            | 5 $\pm$ 2.2                                      |
| Median daily dose prednisone (mg)                                   | 5 (IQR 5-5)                                      |

ACPA: anti-citrullinated protein autoantibodies. RF: rheumatoid factor. DMARD: Disease-modifying antirheumatic drugs. Cs: conventional synthetic. b: biologic. JAK: Janus kinase.
